# Supplementary material
Source: PubMed Central journal article supplement (PMC4830697)
Supplement: NIHMS755905-supplement-New_Supplemental_Information_-_Combined.pdf [file NIHMS755905-supplement-New_Supplemental_Information_-_Combined.pdf]

## Supplemental Information

### **CRISPR Interference Efficiently Induces Specific and Reversible Gene Silencing in Human iPSCs**

Mohammad A. Mandegar, Nathaniel Huebsch, Ekaterina B. Frolov, Edward Shin, Annie Truong, Michael P. Olvera, Amanda H. Chan, Yuichiro Miyaoka, Kristin Holmes, C. Ian Spencer, Luke M. Judge, David E. Gordon, Tilde V. Eskildsen, Jacqueline E. Villalta, Max A. Horlbeck, Luke A. Gilbert, Nevan J. Krogan, Søren P. Sheikh, Jonathan S. Weissman, Lei S. Qi, Po-Lin So, Bruce R. Conklin

|           |                                                                                                                                              |
|-----------|----------------------------------------------------------------------------------------------------------------------------------------------|
| Figure S1 | <b>Derivation and validation of CRISPRi and CRISPRn iPSCs. Related to Figure 1.</b>                                                          |
| Figure S2 | <b>Characterization and doxycycline response of lead CRISPRi and CRISPRn iPSCs. Related to Figure 1.</b>                                     |
| Figure S3 | <b>Comparison of efficiency of CRISPRi knockdown and CRISPRn knockout. Related to Figure 2.</b>                                              |
| Figure S4 | <b>gRNA knockdown efficiency. Related to Figure 3.</b>                                                                                       |
| Figure S5 | <b>Tuning CRISPRi knockdown by titrating doxycycline concentration. Related to Figure 4.</b>                                                 |
| Figure S6 | <b>Differentiation, purification, and doxycycline response of iPS-CMs. Related to Figure 6.</b>                                              |
| Video S1  | <b>Video of CRISPRi iPS-CMs under the GFP channel showing the calcium waves caused by the GCaMP fluorescent signal. Related to Figure 6.</b> |

# Figure S1

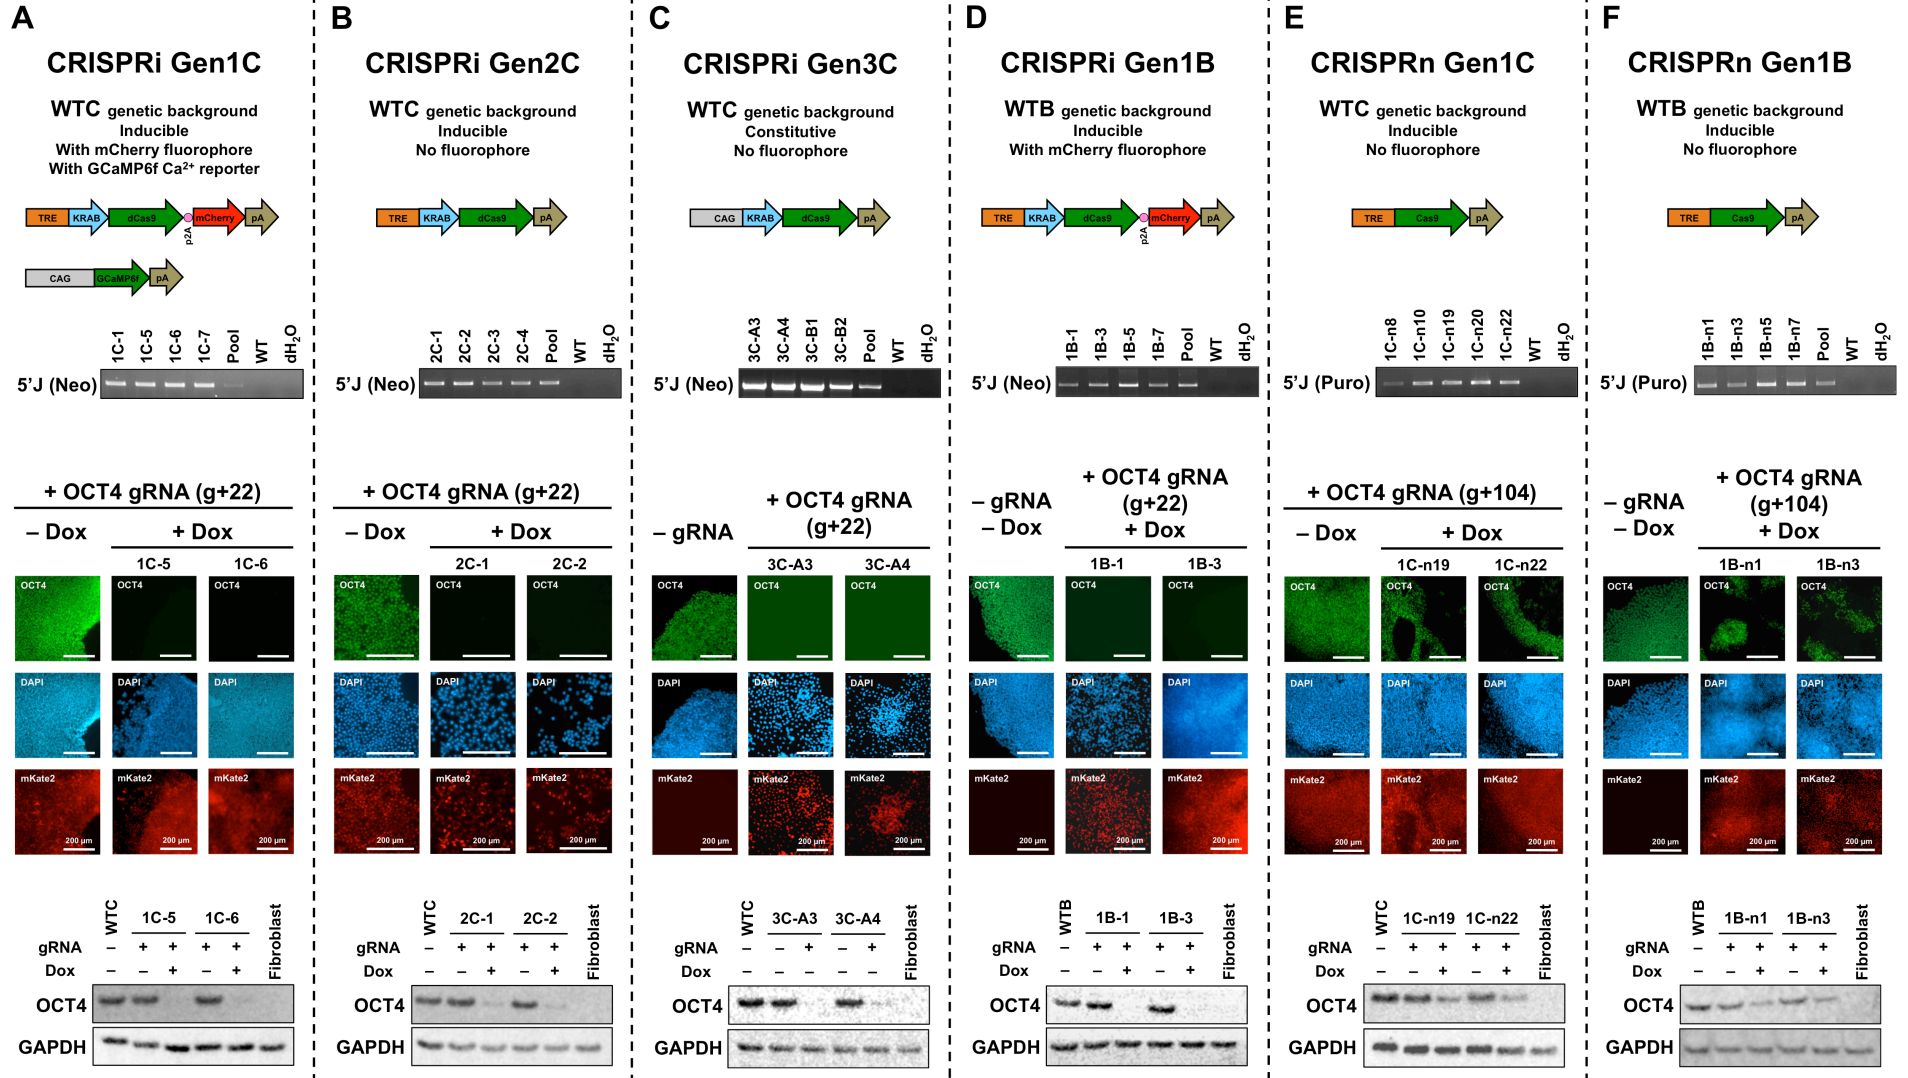

**Figure S1. Derivation and validation of CRISPRi and CRISPRn iPSCs. Related to Figure 1**

(A-F) Schematic diagrams show CRISPRi and CRISPRn targeting constructs used in two different iPSC genetic backgrounds (WTC and WTB). Multiple clones from each targeting event were isolated. A subset of putative clones and a pooled population from each condition were analyzed using junction PCR and confirmed on-target integration of the cassette into the AAVS1 locus. Two putative clones from each condition were initially tested in polyclonal populations containing an OCT4-specific gRNA. Samples were either cultured in the presence or absence of doxycycline (2  $\mu$ M) for 7 days and analyzed using immunocytochemistry. Nuclei were counterstained with DAPI. Clones were also analyzed using western blot with an antibody against OCT4, and GAPDH was used as a loading control. Scale bars = 200  $\mu$ m.

# Figure S2

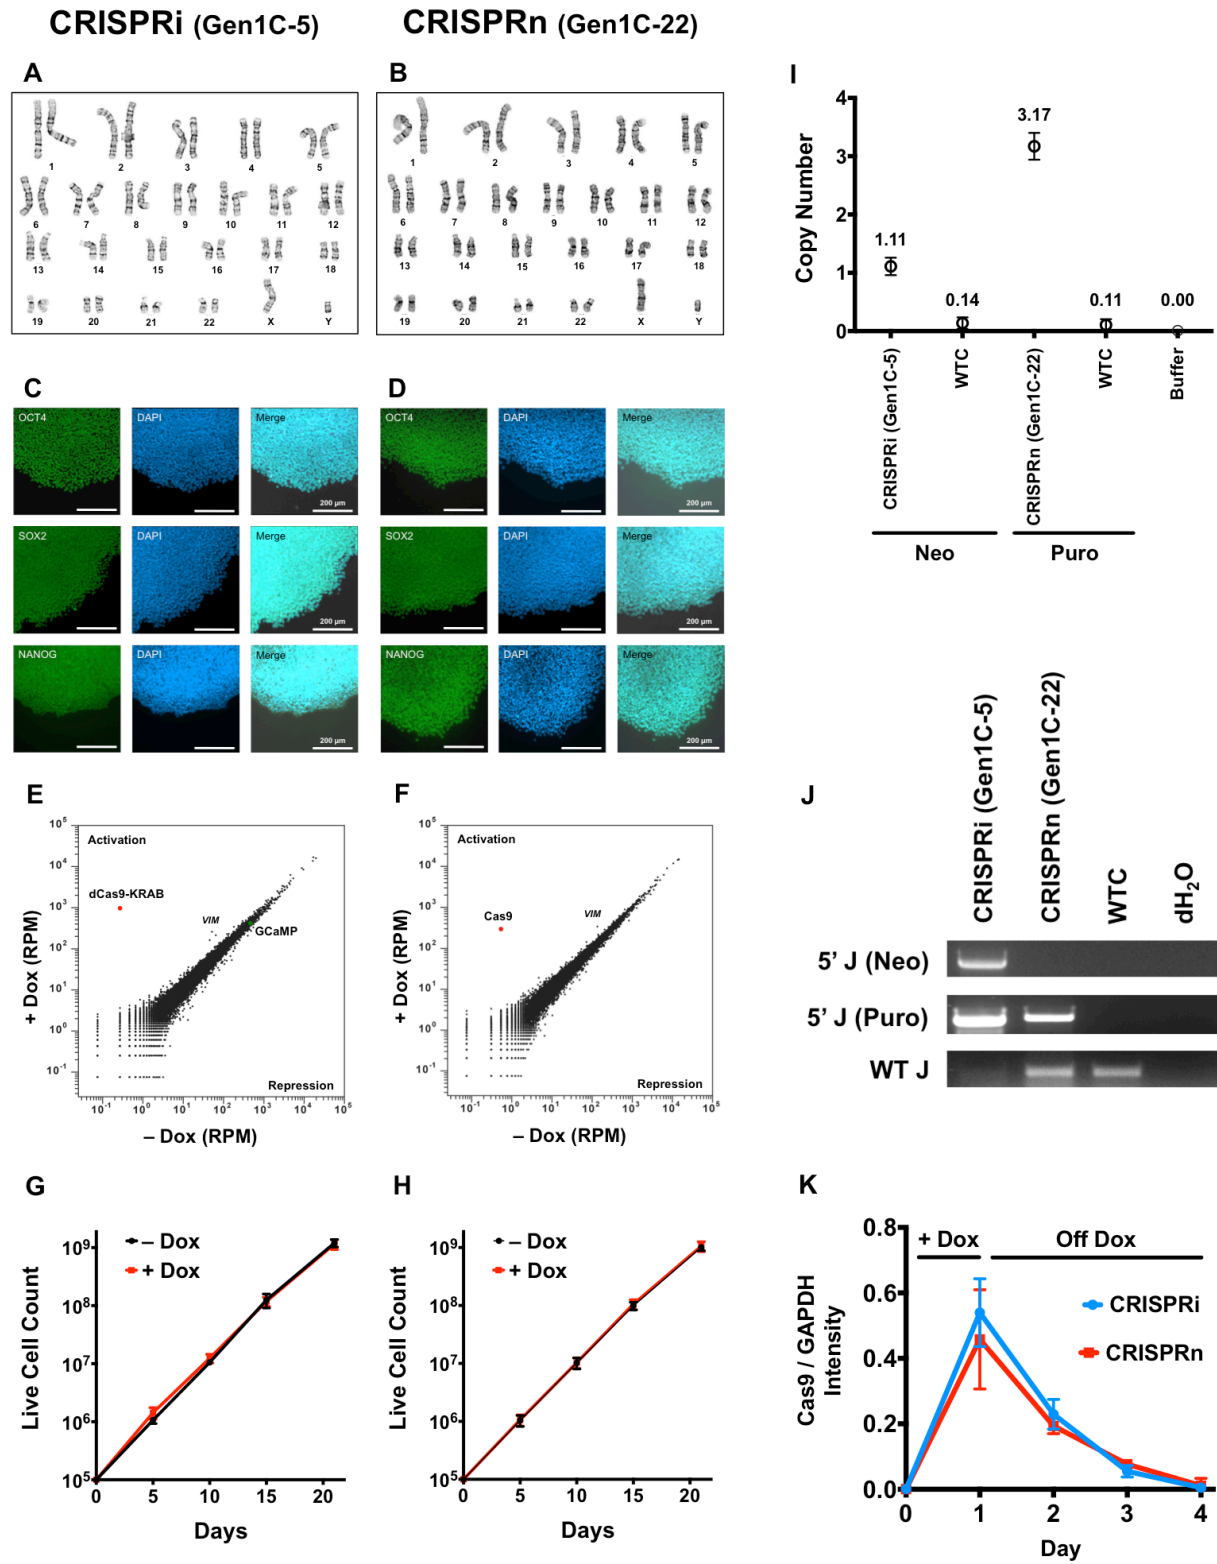



**Figure S2. Characterization and doxycycline response of lead CRISPRi and CRISPRn iPSCs. Related to Figure 1.**

(A, B) Karyotyping of lead CRISPRi (Gen1C 5) and CRISPRn (Gen1C 22) iPSC clones showed both lines are normal. Autosomal and sex chromosomes are annotated. (C, D) Immunostaining of CRISPRi and CRISPRn lines with pluripotency markers OCT4, SOX2, and NANOG (all in green), respectively. Nuclei were counterstained with DAPI. All cells expressed the pluripotency markers, indicating that they maintained their pluripotency after genetic modification. RNA-sequencing RPM (reads per million) are plotted for (E) CRISPRi and (F) CRISPRn iPSC, before and after 7 days of doxycycline treatment (2  $\mu$ M). Expression profiles show robust induction of dCas9-KRAB and Cas9 with few off-target changes. Data is representative of two independent biological replicates. (G, H) CRISPRi and CRISPRn iPSCs were cultured with doxycycline for 3 weeks (4 passages). There were no adverse effects of dCas9-KRAB or Cas9 expression on the proliferative potential of iPSCs. (I) Droplet digital PCR (ddPCR) was used to identify the total number of transgene integration events for CRISPRi and CRISPRn clones with Neomycin- and Puromycin-specific probes, respectively. (J) Junction PCR confirmed on-target integration into the AAVS1 locus of the CRISPRi and CRISPRn clones. The CRISPRi clone also contains the GCaMP expression cassette at the other AAVS1 allele. (K) Intensity analysis of dCas9-KRAB and Cas9 was performed on two independent western blots normalizing the dCas9-KRAB and Cas9 signal intensity to GAPDH using ImageJ. Both the CRISPRi and CRISPRn clones have similar induction profiles. Error bars, SD. Scale bars = 200  $\mu$ m.

# Figure S3

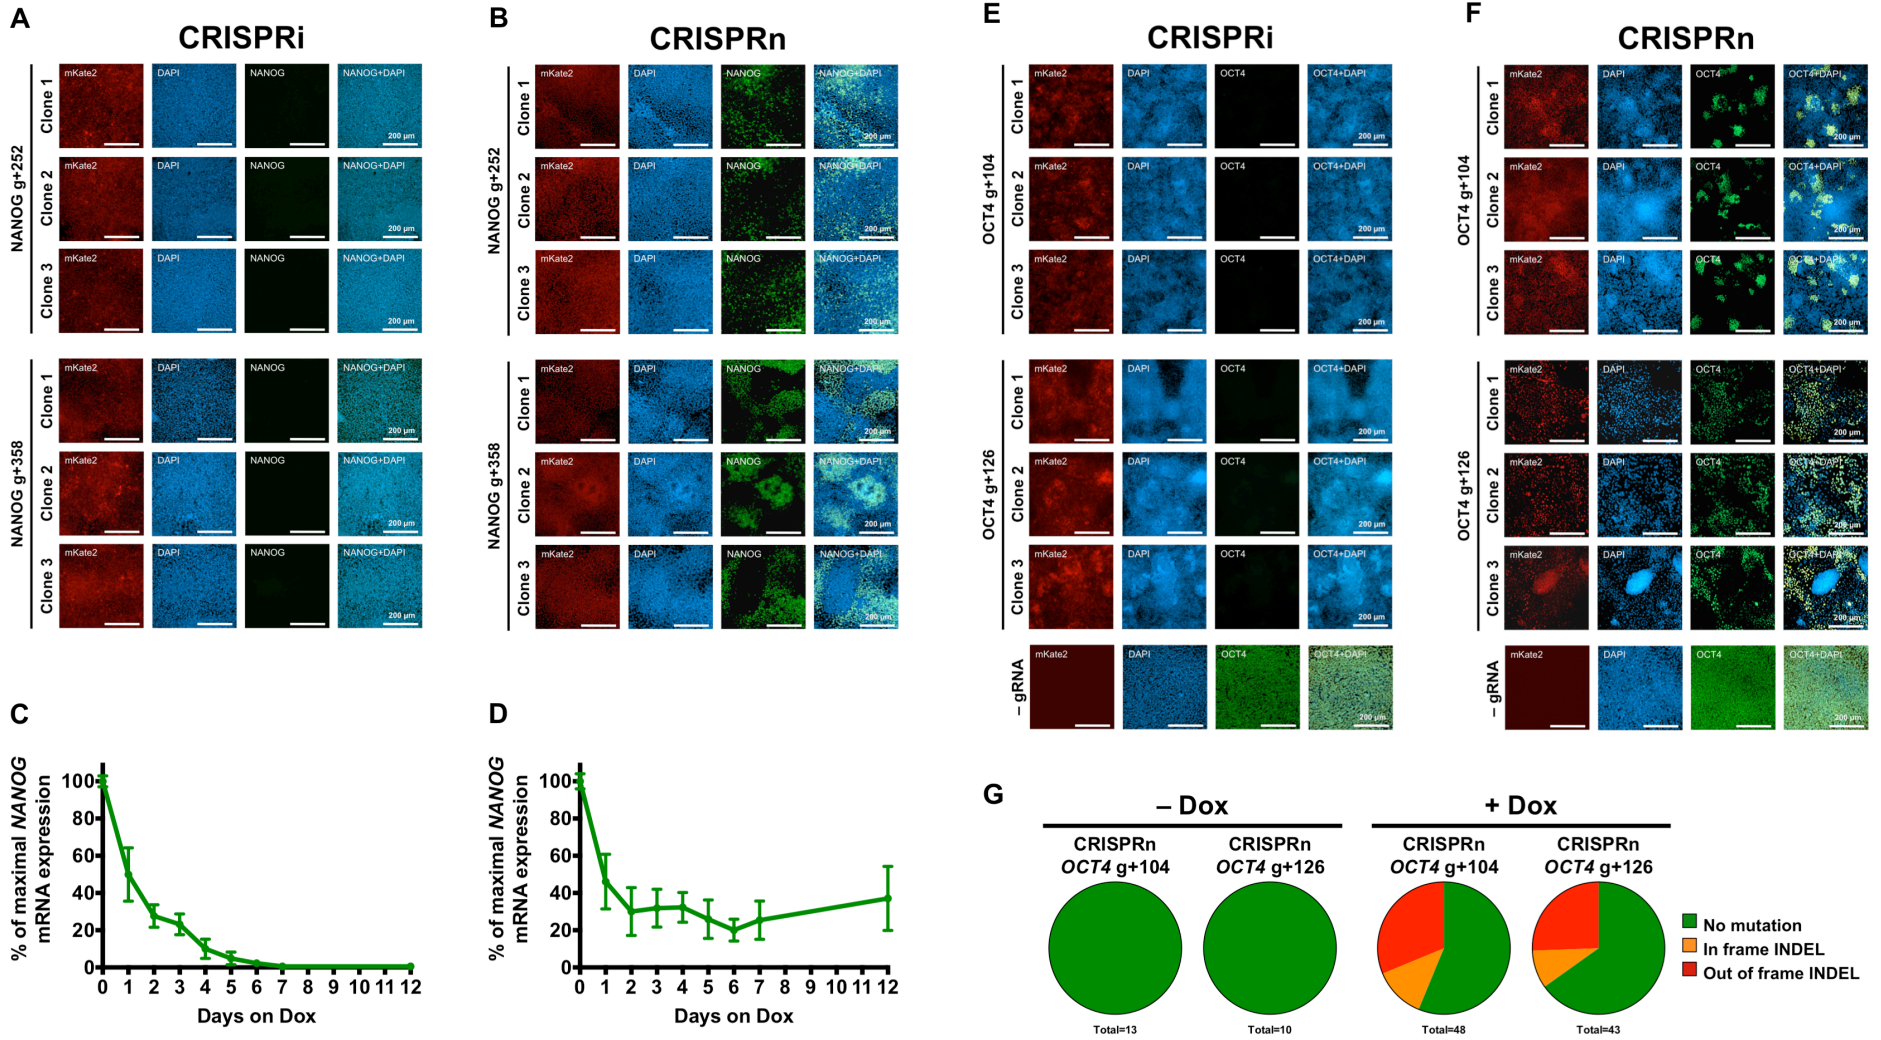

**Figure S3. Comparison of efficiency of CRISPRi knockdown and CRISPRn knockout. Related to Figure 2.**

Immunostaining of three independently-derived (A) CRISPRi and (B) CRISPRn colonies, containing different gRNAs (g+252 and g+358) against the first exon of *NANOG*. All CRISPRi gRNA-containing colonies showed complete knockdown of the target gene, while virtually all CRISPRn colonies showed variegated pattern of *NANOG* knockout. The mKate2 signal highlights the integration of the gRNA-expressing vector in all the cells within each clone. Nuclei were counterstained with DAPI. (C) qPCR analysis of CRISPRi cells show gradual loss of *NANOG* mRNA levels post initiation of knockdown. (D) For CRISPRn, mRNA levels rapidly drop within 2–3 days of knockout induction, however, remain stable thereafter. Immunostaining of three independently-derived stable (E) CRISPRi and (F) CRISPRn colonies containing different gRNAs (g+104 and g+126) against the first exon of *OCT4*. Using CRISPRi, *OCT4* expression was completely lost by 7 days post-doxycycline induction. While using CRISPRn, *OCT4* showed a variegated pattern of knockout and was expressed in 20-30% of the cells 7 days post-doxycycline induction. The mKate2 signal shows the presence of gRNA-expressing vector in all the cells. Nuclei were counterstained with DAPI. (G) Stable CRISPRn clones containing *OCT4* gRNA+104 and gRNA+126 were subjected to continuous doxycycline treatment for 14 days. Genomic DNA was extracted from non-doxycycline- and continuously doxycycline-treated cells and subjected to DNA sequencing. Even after 14 days of continuous doxycycline treatment, 55–65% of sequenced alleles contained no mutation and 30–40% of mutated alleles were in-frame INDELS. Red, out-of-frame INDELS; orange, in-frame INDELS; green, non-mutated alleles. The total number of sequenced colonies is listed below each pie graph. Error bars, SD. Scale bars = 200  $\mu$ m.

# Figure S4

**A**

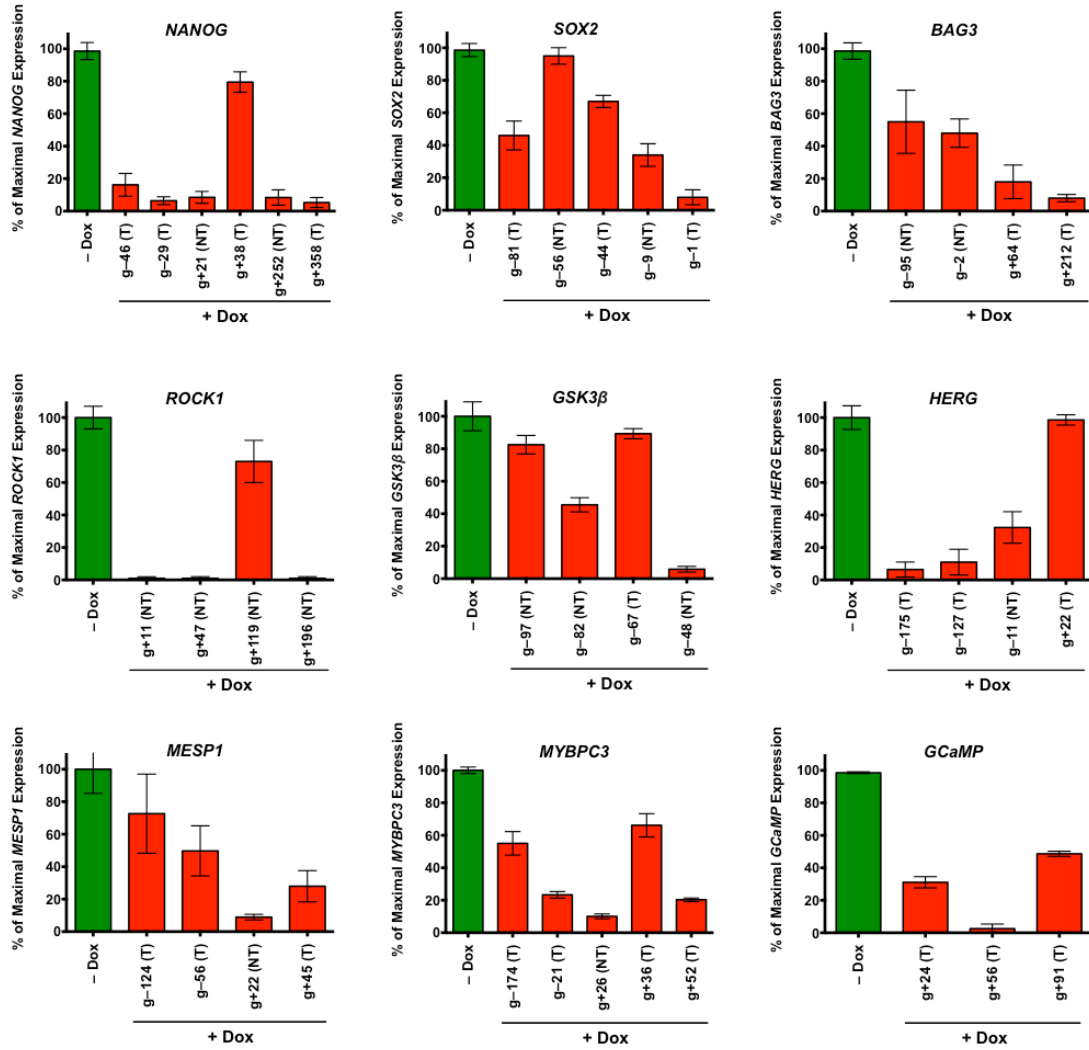

**B**

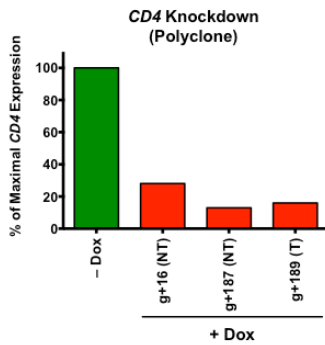

**C**

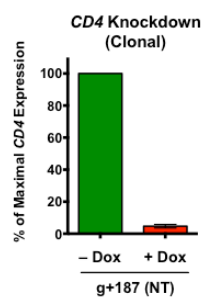

**Figure S4. gRNA knockdown efficiency. Related to Figure 3.**

Three to five gRNAs were designed and tested in polyclonal (A) iPSC and (B) CEM cell populations. In iPSCs, knockdown efficiency was tested using qPCR (except for GCaMP knockdown efficiency which was measured using flow cytometry). For CEM cells, the knockdown efficiency was measured using flow cytometry. The binding location of each gRNA is indicated relative to the TSS of the gene of interest and whether it targets the template (T) or non-template (NT) strand. (C) Three independent CEM clonal lines containing CD4 g+187 were isolated and assayed for CRISPRi knockdown. Each data point is an average of 2–4 technical replicates. Error bars, SD.

Figure S5

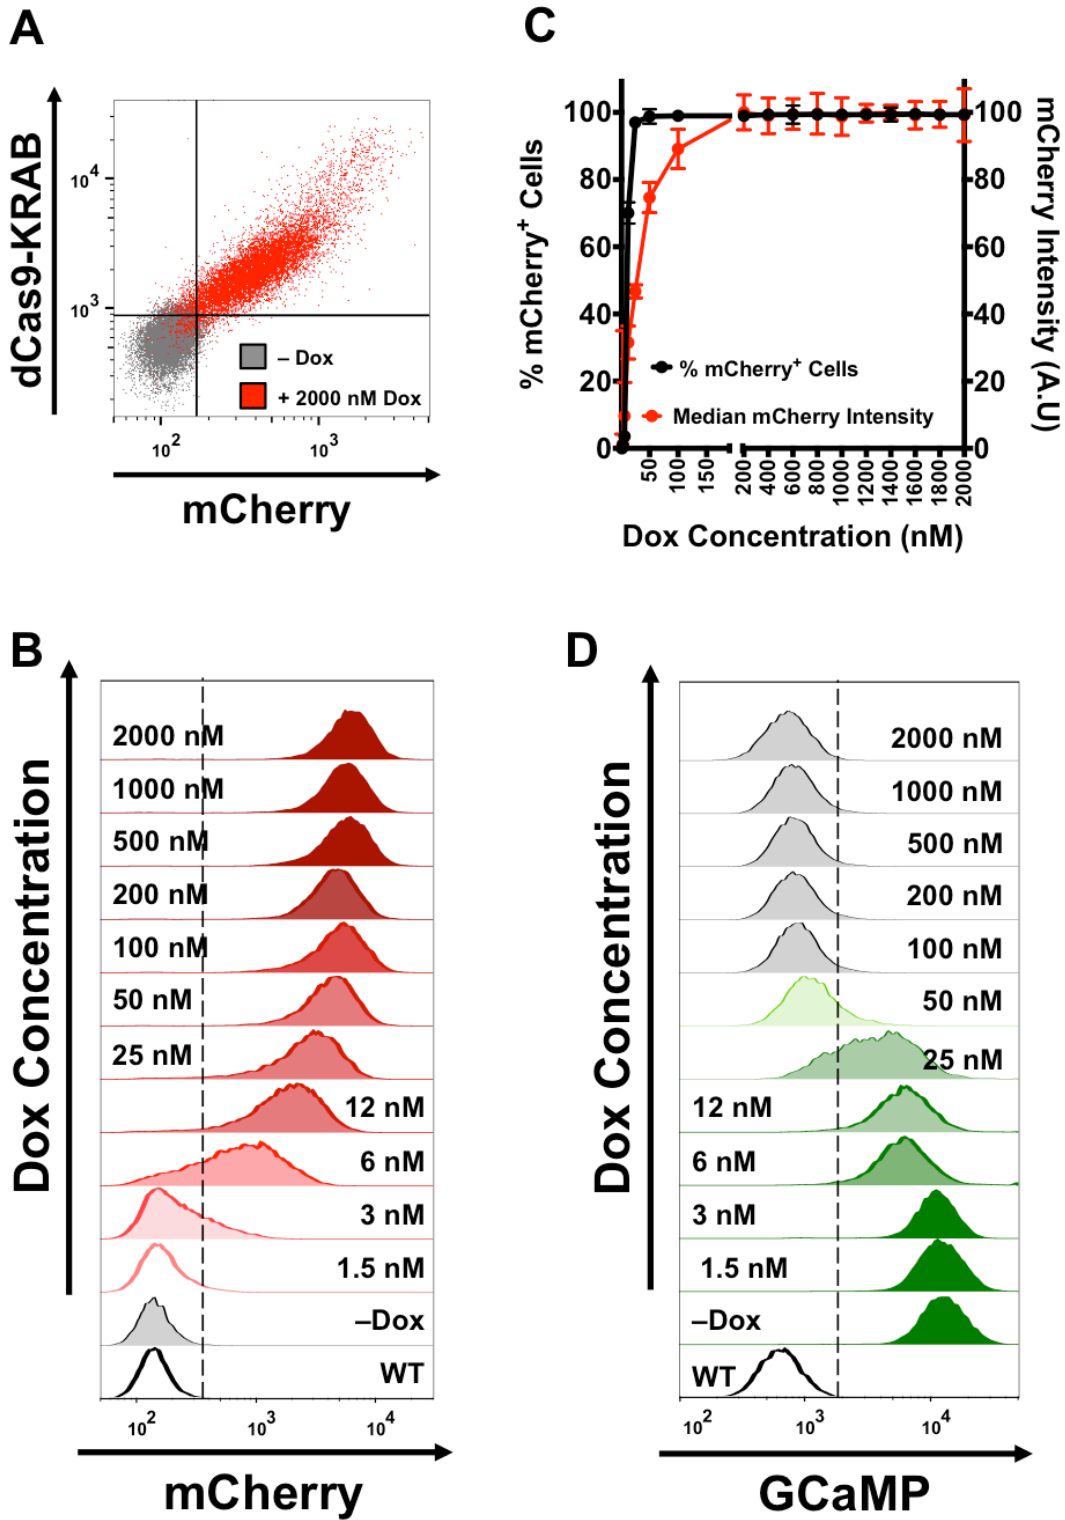

**Figure S5. Tuning CRISPRi knockdown by titrating doxycycline concentration. Related to Figure 4.**

(A) Flow cytometry scatterplot of CRISPRi iPSCs treated with 2  $\mu$ M of doxycycline shows dCas9-KRAB and mCherry are expressed at proportional levels (translated from a bicystronic transcript). (B) mCherry expression was measured using flow cytometry to test the response of the CRISPRi cells to various doses of doxycycline. (C) The percentage of mCherry-positive cells and mCherry fluorescent intensity as measured by the median fluorescent intensity) were plotted at different doxycycline concentrations. As a single copy, the TetO promoter behaves similar to a binary switch and only within a narrow range of doxycycline concentration, the expression can be robustly tuned. (D) By titrating the dose of doxycycline, GCaMP expression levels could be tuned within a narrow range (3-12 nM). Flow cytometry plots representative of three biological replicates. Error bars, SD.

# Figure S6

**A**

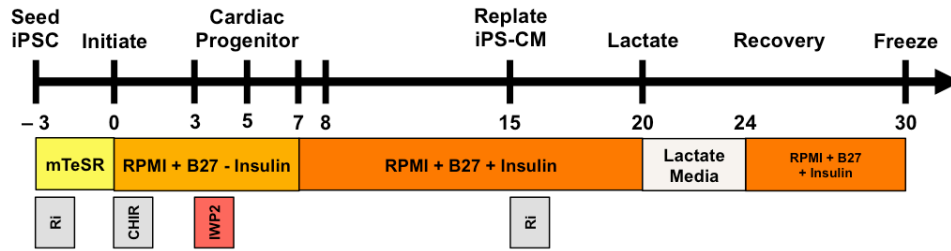

**B**

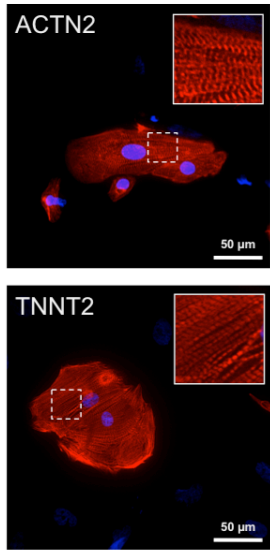

**C**

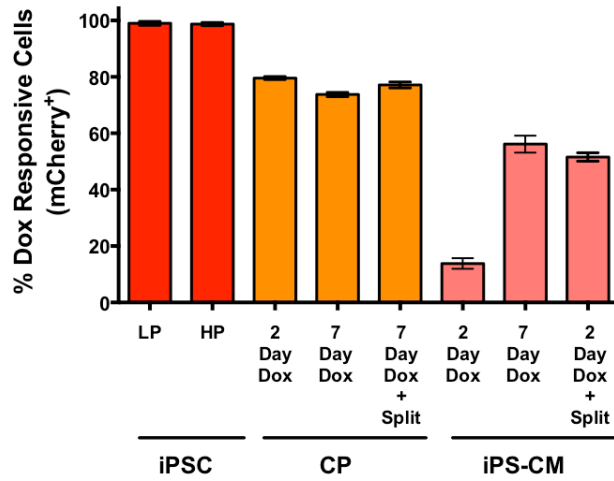

**D**

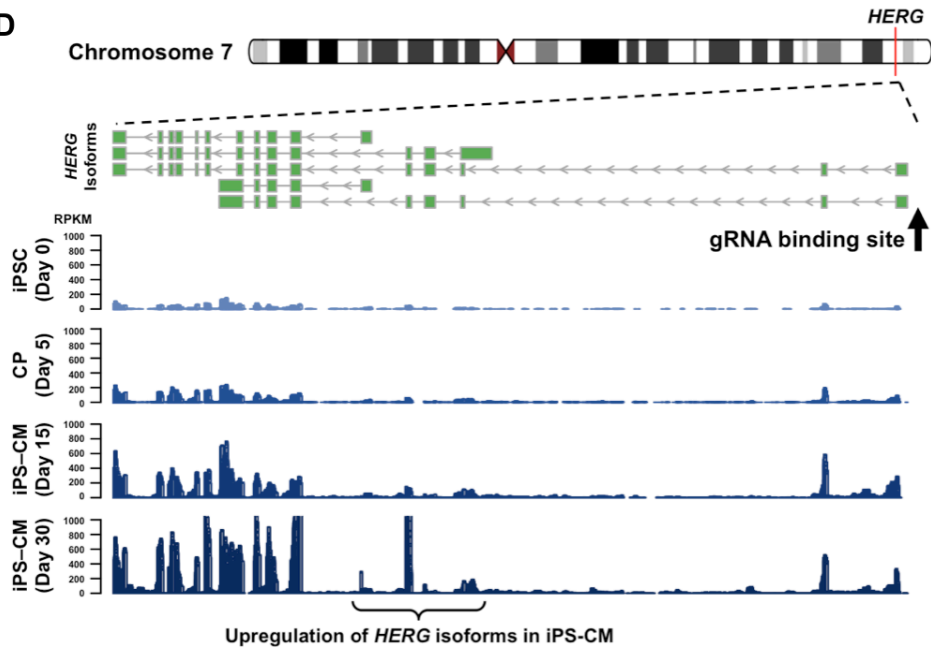



**Figure S6. Differentiation, purification and doxycycline response of iPS-CMs. Related to Figure 6.**

(A) Schematic diagram of the modified WNT-differentiation protocol for iPS-derived cardiomyocyte (iPS-CM) differentiation, lactate purification, and cryopreservation. (B) Lactate-purified iPS-CMs were stained with sarcomeric-specific markers ACTN2 and TNNT2. (C) Flow cytometry was used to measure doxycycline responsiveness (using mCherry expression) of low-passage (LP) and high-passage (HP; 3 months in culture) iPSC, cardiac progenitors (CP; day 5) and iPS-derived cardiomyocyte (iPS-CM; day 15) CRISPRi cells. Both low and high passage iPSC fully respond to doxycycline. 75-80% of cardiac progenitors cells respond to doxycycline. Less than 20% of iPS-CM responded to doxycycline after 2 days of treatment, while increasing the duration of doxycycline treatment to 7 days increases the percentage of responsive cells. Furthermore, only 2 days of doxycycline treatment with splitting the cells enabled more than 50% of the cells to respond. This indicates that the differentiated cells are prone to silencing at the TetO promoter. (D) RNA-Seq reads from the *HERG* transcript isoforms during iPS-CM differentiation. An arrow indicates the gRNA binding location, which targets the major transcript expressed in iPSCs. During cardiac differentiation, activation of the other isoforms (indicated by a bracket) is observed. Error bars, SD. Scale bars = 50  $\mu$ m.

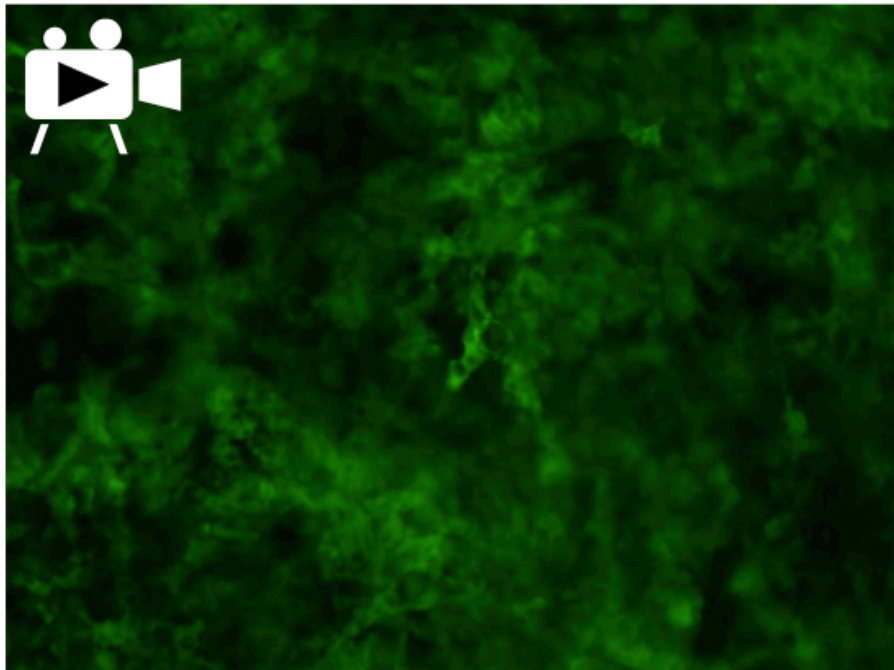

**Video S1. Video of CRISPRi iPS-CMs under the GFP channel showing the calcium waves caused by the GCaMP fluorescent signal. Related to Figure 6.**

## Supplemental Experimental Procedures

### iPSC Culture

Episomal reprogramming (Okita et al., 2011) was used to reprogram dermal fibroblasts from a healthy male and female individual to wild-type C (WTC) and wild-type B (WTB) human iPSC, respectively. The committee on Human Research at the University of California, San Francisco (UCSF) approved the iPSC-research protocol (#10-02521).

### CRISPRi, CRISPRn, and GCaMP6f AAVS1 Knock-In Vectors

To generate iPSC lines with inducible CRISPR interference (CRISPRi) and CRISPR nuclease (CRISPRn), a single tetracycline-inducible vector was constructed to contain both the reverse tetracycline-controlled transcriptional activator (rtTA) and the tetracycline-response element (TRE3G). A strong constitutive promoter (CAG) transcribes rtTA and is oriented in the opposite direction of TRE3G element to ensure no leaky expression of the transgene without doxycycline. The TetO promoter transcribes dCas9-KRAB-P2A-mCherry (CRISPRi Gen1), dCas9-KRAB (CRISPRi Gen2) or Cas9 (CRISPRn Gen1). In the non-inducible CRISPRi clones (CRISPRi Gen3) dCas9-KRAB is expressed from the constitutive CAG promoter. In all CRISPRi lines, the KRAB domain is fused at the N-terminus of dCas9 (Gilbert et al., 2014). All CRISPRi and CRISPRn targeting vectors contained left- and right-homology arms (~800 bp) that flank the genomic-cut site in the AAVS1 locus. The vectors also contained a splice-acceptor (SA) site followed by the open reading frame (ORF) of a promoterless T2A-neomycin or T2A-puromycin resistance gene cassette, respectively (Figures 1A and 1B). The GCaMP6f knock-in vector that is specific for AAVS1 contains ~800 bp left and right of the AAVS1-homology arms, an SA site followed by the ORF of a promoterless T2A-puromycin resistance gene, and the GCaMP6f ORF driven off the CAG promoter (Figure 4).

### Description of vectors

| Vector Name<br>(Size)                           | Description &<br>Addgene ID                                                                                         | Promoter                                         | Promoter                                        | Bacterial<br>Resistance<br>Gene |
|-------------------------------------------------|---------------------------------------------------------------------------------------------------------------------|--------------------------------------------------|-------------------------------------------------|---------------------------------|
|                                                 |                                                                                                                     | Transgene of interest                            | Mammalian<br>Resistance<br>Gene                 |                                 |
| AAVS1<br>TALEN F<br>(8,345 bp)                  | Homodimeric AAVS1<br>TALEN<br>right pair                                                                            | CMV<br><br>RVD-FOK1                              | SV40<br><br><i>Neo<sup>R</sup></i>              | <i>Amp</i> and<br><i>Kan</i>    |
| AAVS1<br>TALEN R<br>(8,345 bp)                  | Homodimeric AAVS1<br>TALEN<br>left pair                                                                             | CMV<br><br>RVD-FOK1                              | SV40<br><br><i>Neo<sup>R</sup></i>              | <i>Amp</i> and<br><i>Kan</i>    |
| pAAVS1-NDi-<br>CRISPRi<br>(Gen1)<br>(13,834 bp) | Dox-inducible CRISPR<br>interference (CRISPRi)<br>knock in construct into<br>the AAVS1 locus with<br>mCherry marker | TetO (TRE3G)<br><br>dCas9-KRAB<br>P2A<br>mCherry | Endogenous<br>AAV<br><br><i>Neo<sup>R</sup></i> | <i>Amp</i>                      |

|                                          |                                                                                                                                          |                                                                                         |                                               |     |
|------------------------------------------|------------------------------------------------------------------------------------------------------------------------------------------|-----------------------------------------------------------------------------------------|-----------------------------------------------|-----|
|                                          | (Gen1 CRISPRi vector)                                                                                                                    | (KRAB domain is fused at the N-terminus of dCas9)                                       |                                               |     |
| pAAVS1-NDi-CRISPRi (Gen2)<br>(13,069 bp) | Dox-inducible CRISPR interference (CRISPRi) knock in construct into the AAVS1 locus<br><br>(Gen2 CRISPRi vector)                         | TetO (TRE3G)<br><br>dCas9-KRAB<br><br>(KRAB domain is fused at the N-terminus of dCas9) | Endogenous AAV<br><br>Neo <sup>R</sup>        | Amp |
| pAAVS1-NC-CRISPRi (Gen3)<br>(11,437 bp)  | Constitutive CRISPR interference (CRISPRi) knock in construct into the AAVS1 locus<br><br>(Gen3 CRISPRi vector)<br><br>Addgene ID: 73499 | CAG<br><br>dCas9-KRAB<br><br>(KRAB domain is fused at the N-terminus of dCas9)          | Endogenous AAV<br><br>Neo <sup>R</sup>        | Amp |
| pAAVS1-PDi-CRISPRn<br>(12,658 bp)        | Dox-inducible CRISPR nuclease (CRISPRn) knock in construct into the AAVS1 locus                                                          | TetO (TRE3G)<br><br>spCas9                                                              | Endogenous AAV<br><br>Puro <sup>R</sup> (Pac) | Amp |
| pgRNA-CKB<br>(9,596 bp)                  | Guide RNA expression vector (with mKate2)<br><br>Addgene ID: 73501                                                                       | CAG<br><br>NLS-mKate2-T2A-Bsd<br><br>Mouse U6<br><br>gRNA                               | CAG<br><br>Bsd <sup>R</sup> (Bsr)             | Amp |
| pgRNA-CGB<br>(9,617 bp)                  | Guide RNA expression vector (with GFP)<br><br>Addgene ID: 73502                                                                          | CAG<br><br>NLS-GFP-T2A-Bsd<br><br>Mouse U6<br><br>gRNA                                  | CAG<br><br>Bsd <sup>R</sup> (Bsr)             | Amp |
| pAAVS1-PC-GCaMP6f<br>(8,007 bp)          | GCaMP knock in construct into the AAVS1 locus<br><br>Addgene ID: 73503                                                                   | CAG<br><br>GCaMP6f                                                                      | Endogenous AAV<br><br>Puro <sup>R</sup> (Pac) | Amp |

### **gRNA Design and Cloning into the gRNA-Expression Vector**

If empirical data were available based on RNAseq or cDNA sequences from iPSC and iPS-CM, those were given priority over the NCBI database. For CRISPRn, up to three gRNAs were designed to target within the first common exon of the gene of interest with a minimal number of off-target sites in the genome. MIT CRISPR design (<http://crispr.mit.edu>) was used to design and predict the number of off-target events in the genome. When possible, the location of the gRNA-binding site was scattered along the chosen stretch of DNA and targeted to both the template (T) and non-template (NT) strands while

choosing the highest-ranking gRNAs with the least number of predicted off-target events in the genome.

The parental gRNA-expression vector (pgRNA-CKB) contained a "16nt" sequence (GGAGACGGACGTCTCC) with two BsmBI restriction sites for cloning the gRNA oligos. This vector served as the "scrambled" gRNA sequence. The gRNA-expression vector expressed only a single gRNA of interest from a mouse U6 promoter and contained a reporter and selection cassette with nuclear-localized mKate2-T2A-Blasticidin, driven off the CAG promoter. For cloning each gRNA into the expression vector (pgRNA-CKB), one forward oligo was designed with its reverse complement and ordered from Integrated DNA Technologies (IDT). In addition, a 4-nt overhang "TTGG" was added to the 5' end of the forward primer and a 4-nt overhang of "AAAC" was added to the 5' end of the reverse primer (see below for examples of gRNA oligos). Each forward and reverse oligo (100 μM) was placed in the same reaction, phosphorylated using T4 PNK (NEB), and annealed by first heating to 95°C and then slowly ramping down to 25°C at 5°C per min. The pgRNA-CKB vector was digested with BsmBI (NEB), treated with FastAP (Life Technologies), and run on a 1% (w/v) agarose (Sigma) gel. The ~9.6 kb linear DNA fragment was extracted using the QIAquick Gel Extraction Kit (Qiagen). The linearized vector (50–100 ng) and diluted phospho-annealed oligos (1 μl of 1:100) were ligated overnight at room temperature with T4 DNA ligase (NEB). The ligated product was transformed into Turbo competent E. coli (NEB). Sequencing primers gRNA Seq F (5'-GAGATCCAGTTTGGTTAGTACCGGG-3') and gRNA Seq R (5'-ATGCATGGCGGTAATACGG TTAT-3') were used to confirm the ligation of the correct gRNA.

gRNA oligo sequences are listed as below. gRNA naming is based on the binding coordinates relative to the transcription start site (TSS) of the gene of interest, and whether they target the template (T) and non-template (NT) strand. A negative coordinate indicates a binding location upstream of the TSS and a positive coordinate indicates a binding location downstream of the TSS. The most commonly used gRNAs for efficient knockdown are indicated with a bold text and column outline. Forward and reverse primers for cloning into the pgRNA-CKB gRNA-expression vector are listed from 5' to 3'. The 4-nt overhang sequences on the forward and reverse primers (highlighted in red) are used to clone phospho-annealed products into the pgRNA-CKB vector after BsmBI digest. The gRNA protospacer sequence is in black and designated as (N)<sub>20</sub> and the constant-tracer sequence is in blue.

5'-NNNNNNNNNNNNNNNNNNNNNNNNNNNNNN**GTTTAAGAGCTATGCTGGAAACAGCATAGCAAGTTTAAATAAG**  
**GCTAGTCCGTTATCAACTTGAAAAAGTGGCACCGAGTCGGTGCTTTTTTTT** -3'

| gRNA Name<br>(Targeting Strand) | Oligo Sequences<br>5' – Forward Primer – 3'<br>5' – Reverse Primer – 3' | Notes |
|---------------------------------|-------------------------------------------------------------------------|-------|
| OCT4 g-142 (T)                  | <b>TTGG</b> GGGGCGCCAGTTGTGTCTCC<br><b>AAAC</b> GGAGACACAACCTGGCGCCC    |       |

|                        |                                                              |                                                                                                                                       |
|------------------------|--------------------------------------------------------------|---------------------------------------------------------------------------------------------------------------------------------------|
| OCT4 g-105 (NT)        | TTGGGGCGAAGGATGTTTGCCTAA<br>AAACTTAGGCAAACATCCTTCGCC         |                                                                                                                                       |
| OCT4 g-7 (T)           | TTGGAAGGCTAGTGGGTGGGACTG<br>AAACCAGTCCCACCCACTAGCCTT         |                                                                                                                                       |
| OCT4 g-4 (T)           | TTGGGCTAGTGGGTGGGACTGGGG<br>AAACCCCCAGTCCCACCCACTAGC         | Because the PAM-binding site contains an SNP at the OCT4 locus, this gRNA binds to only one OCT4 allele and knocks down OCT4 by ~40%. |
| <b>OCT4 g+22 (NT)</b>  | <b>TTGGGGTGAATGAGGGCTTGCGA<br/>AAACTCGCAAGCCCTCATTTACCC</b>  | <b>OCT4 g+22 is the most commonly used gRNA for efficient OCT4 knockdown.</b>                                                         |
| OCT4 g+42 (T)          | TTGGTCGCAAGCCCTCATTTACCC<br>AAACGGTGAATGAGGGCTTGCGA          | This gRNA does not knock down OCT4.                                                                                                   |
| OCT4 g+56 (T)          | TTGGTTCACCAGGCCCGGCTTG<br>AAACCAAGCCGGGGGCTGGTGAA            |                                                                                                                                       |
| OCT4 g+104 (NT)        | TTGGACCACCTGGAGGGGCGAGA<br>AAACTCTCGCCCCCTCCAGGTGGT          | This gRNA was used for both CRISPRi and CRISPRn                                                                                       |
| OCT4 g+126 (T)         | TTGGTCGCCCCCTCCAGGTGGTGG<br>AAACCCACCACCTGGAGGGGCGGA         | This gRNA was used for both CRISPRi and CRISPRn                                                                                       |
| OCT4 g+701 (T)         | TTGGCGAAGAGACAACCTGCCGGTG<br>AAACCACCGGCAGTTGTCTCTTCG        | This gRNA does not knock down OCT4.                                                                                                   |
| OCT4 g+1305 (NT)       | TTGGGCTTACACTTGTGCGCTTGA<br>AAACTCAAGGCGACAAGTGTAAAGC        | This gRNA does not knock down OCT4.                                                                                                   |
| OCT4 g+2390 (NT)       | TTGGGGAGTGCCTGGCGCGATCT<br>AAACAGATCGCGCCAGTGCCTCC           | This gRNA does not knock down OCT4.                                                                                                   |
| OCT4 g+3410 (NT)       | TTGGGTCTGTAATCCTAGCACTT<br>AAACAAGTGCTAGGATTTACAGAC          | This gRNA does not knock down OCT4.                                                                                                   |
| OCT4 g+4580 (T)        | TTGGGTAGGTTCTTGAATCCCGAA<br>AAACTTCGGGATTCAAGAACCCTAC        | This gRNA does not knock down OCT4.                                                                                                   |
| OCT4 g+5632 (T)        | TTGGCACCTCGCTTTCCCTAGCTC<br>AAACGAGCTAGGGAAAGCGAGGTG         | This gRNA does not knock down OCT4.                                                                                                   |
| NANOG g-46 (T)         | TTGGTCACAAGGGTGGGTCAGTAG<br>AAACCTACTGACCCACCCTTGTGA         |                                                                                                                                       |
| NANOG g-29 (T)         | TTGGTAGGGGGTGTGCCCGCCAGG<br>AAACCCTGGCGGGCACACCCCTTA         |                                                                                                                                       |
| <b>NANOG g+21 (NT)</b> | <b>TTGGCCAGCAGAACGTTAAAATCC<br/>AAACGGATTTTAACGTTCTGCTGG</b> | <b>NANOG g+21 is the most commonly used gRNA for efficient NANOG knockdown.</b>                                                       |
| NANOG g+38 (T)         | TTGGCCAGGATTTTAACGTTCTGC<br>AAACGCAGAACGTTAAAATCCTGG         |                                                                                                                                       |
| NANOG g+252 (NT)       | TTGGCAGTCGGATGCTTCAAAGCA<br>AAACTGCTTTGAAGCATCCGACTG         | This gRNA was used for both CRISPRi and CRISPRn.                                                                                      |
| NANOG g+358 (T)        | TTGGTTCGTGCTGAGATGCCACACA<br>AAACTGTGAGGCATCTCAGCAGAA        | This gRNA was used for both CRISPRi and CRISPRn.                                                                                      |
| SOX2 g-81 (T)          | TTGGTCATGCAAAAACCCGGCAGCG<br>AAACCGCTGCCGGGTTTTCATGA         |                                                                                                                                       |
| SOX2 g-56 (NT)         | TTGGAGCGACCAATCAGCGCGCGG<br>AAACCCGCGCGCTGATTGGTTCGCT        |                                                                                                                                       |
| SOX2 g-44 (T)          | TTGGAGGAGCCCGCGCGCTGAT<br>AAACATCAGCGCGCGGCGCTCCT            |                                                                                                                                       |
| SOX2 g-9 (NT)          | TTGGGACAACCATCCATGTGACGG<br>AAACCCGTACATGGATGGTTGTC          |                                                                                                                                       |
| <b>SOX2 g-1 (T)</b>    | <b>TTGGCCCTGACAGCCCCGTCACA<br/>AAACTGTGACGGGGGCTGTACAGG</b>  | <b>SOX2 g-1 is the most commonly used gRNA for efficient SOX2 knockdown.</b>                                                          |
| BAG3 g-95 (NT)         | TTGGTTCGGACTCGTGCGCGTGCC<br>AAACGGCACGCGCACGAGTCGGAA         |                                                                                                                                       |
| BAG3 g-2 (NT)          | TTGGGTCATCGGCTATAATCGCGG                                     |                                                                                                                                       |

|                                         |                                                      |                                                                                                                                                                                                |
|-----------------------------------------|------------------------------------------------------|------------------------------------------------------------------------------------------------------------------------------------------------------------------------------------------------|
|                                         | AAACCCGCGATTATAGCCGATGAC                             |                                                                                                                                                                                                |
| BAG3 g+64 (T)                           | TTGGCGGGCCGCGCCAACCTTCTC<br>AAACGAGAAGTTGGCCGCGCCCCG |                                                                                                                                                                                                |
| <b>BAG3 g+212 (T)</b>                   | TTGGTTCATAAAGGTGCCCGGCGC<br>AAACGCGCCGGCACCTTATGAA   | BAG3 g+212 is the most commonly used gRNA for efficient BAG3 knockdown.                                                                                                                        |
| <b>ROCK1 g+11 (NT)</b>                  | TTGGCGGGGCGCGACGCTCGGAA<br>AAACTTCCGAGCGTCCGCGCCCCG  | ROCK1 g+11 is the most commonly used gRNA for efficient ROCK1 knockdown.                                                                                                                       |
| ROCK1 g+47 (NT)                         | TTGGCAAACAAACGGAGACCGCCG<br>AAACCGGCGGTCTCCGTTTGTTTG |                                                                                                                                                                                                |
| ROCK1 g+119 (NT)                        | TTGGAGTCGCGGCGGCGAATGCCT<br>AAACAGGCATTCGCCCGCCGACT  |                                                                                                                                                                                                |
| ROCK1 g+196 (NT)                        | TTGGAGACGATAGTTGGGTCCCGG<br>AAACCCGGGACCCAATAATCGTCT |                                                                                                                                                                                                |
| GSK3 $\beta$ g-97 (NT)                  | TTGGGGATCCGGCGGGCTGACGGC<br>AAACGCCGTCAGCCCGCCGGATCC |                                                                                                                                                                                                |
| GSK3 $\beta$ g-82 (NT)                  | TTGGCTCCGGCAAGCCGCGGGATC<br>AAACGATCCCGCGGCTTGCCGGAG |                                                                                                                                                                                                |
| GSK3 $\beta$ g-67 (T)                   | TTGGCGCCGGATCCCGCGGCTTGC<br>AAACGCAAGCCGCGGGATCCGGCG |                                                                                                                                                                                                |
| <b>GSK3<math>\beta</math> g-48 (NT)</b> | TTGGGGGTGGCTCGGAGATGCGAC<br>AAACGTCGCATCTCCGAGCCACCC | GSK3 $\beta$ g-48 is the most commonly used gRNA for efficient GSK3 $\beta$ knockdown.                                                                                                         |
| <b>HERG g-175 (T)</b>                   | TTGGTTCTGGGCGCGGAGTCCCA<br>AAACTGGGACTCGCGGCCAGAA    | HERG g-175 is the most commonly used gRNA for efficient HERG knockdown in iPSC and iPS-CM.                                                                                                     |
| HERG g-127 (T)                          | TTGGCGTTGGGGGAGCACTCGGCG<br>AAACCGCCGAGTGCTCCCCAACG  |                                                                                                                                                                                                |
| HERG g-11 (NT)                          | TTGGTAATGCGGCGCGGCCCTC<br>AAACGAGGGGCGCGCCGCATTA     |                                                                                                                                                                                                |
| HERG g+22 (T)                           | TTGGCGCATTAACCTTCCGCGGC<br>AAACGCCGCGGAAGGGTTAATGCG  |                                                                                                                                                                                                |
| MESP1 g-124 (T)                         | TTGGTGGGTCGGGCGCCCAAGCGA<br>AAACTCGCTTGGGCGCCCGACCCA |                                                                                                                                                                                                |
| MESP1 g-56 (T)                          | TTGGCCCCCGCCGTGGATTCAAA<br>AAACTTTGAATCCACGGCGGGGGG  |                                                                                                                                                                                                |
| <b>MESP1 g+22 (NT)</b>                  | TTGGGCCGCTTATGCCGAGCCCG<br>AAACCGGGCTCGGCATAAAGCGGC  | MESP1 g+22 is the most commonly used gRNA for efficient MESP1 knockdown.                                                                                                                       |
| MESP1 g+45 (T)                          | TTGGGCTCGGCATAAAGCGGCCGC<br>AAACGCGGCCGCTTATGCCGAGC  |                                                                                                                                                                                                |
| MYBPC3 g-174 (T)                        | TTGGAATTGTGCTGCGGGGGTGA<br>AAACTCACCCCCCGCAGACAATT   |                                                                                                                                                                                                |
| MYBPC3 g-21 (T)                         | TTGGGGGAGGTCCCCATATATAGT<br>AAACACTATATATGGGGACCTCCC |                                                                                                                                                                                                |
| <b>MYBPC3 g+26 (NT)</b>                 | TTGGCGTCACACCAGGCACGAAGC<br>AAACGCTTCGTGCCTGGTGTGACC | MYBPC3 g+26 is the most commonly used gRNA for efficient MYBPC3 knockdown.                                                                                                                     |
| MYBPC3 g+36 (T)                         | TTGGACCTGTGCTGCTTTCGTGCC<br>AAACGGCACGAAGCAGGCACAGGT |                                                                                                                                                                                                |
| MYBPC3 g+52 (T)                         | TTGGTGCCTGGTGTGACGTCTCTC<br>AAACGAGAGACGTCACACCAGGCA |                                                                                                                                                                                                |
| GCaMP g+24 (T)                          | TTGGTTGACTCATCACGTCGTAAG<br>AAACCTTACGACGTGATGAGTCAA | gRNAs target the template strand of GCaMP6f open reading frame. Unlike guides targeting endogenous loci, the coordinates of the GCaMP guides are based on the translation start site (starting |
| <b>GCaMP g+56 (T)</b>                   | TTGGGGTCACGCAGTCAGAGCTAT<br>AAACATAGCTCTGACTGCGTGACC |                                                                                                                                                                                                |

|                       |                                                                                                                          |                                                                                                                                                                                                                                                                                                                     |
|-----------------------|--------------------------------------------------------------------------------------------------------------------------|---------------------------------------------------------------------------------------------------------------------------------------------------------------------------------------------------------------------------------------------------------------------------------------------------------------------|
| GCaMP g+91 (T)        | <b>TTGG</b> ACTCGAGAACGTCTATATCA<br><b>AAAC</b> TGATATAGACGTTCTCGAGT                                                     | from ATG).<br>GCaMP g+56 was the most efficient guide at knockdown and was used for the reversibility and RNA-Seq experiments.                                                                                                                                                                                      |
| CD4 g+16 (NT)         | <b>TTGG</b> GCTCCTCCACACCCTAGGCC<br><b>GTTT</b> AAGAGC<br><b>TTAG</b> CTCTTAAACGGCCTAGGGTG<br>TGGAGGAGCC <b>CAACAAG</b>  | gRNA oligo sequences targeting near the CD4 TSS targeting either the template (T) or non-template (NT) strand.<br>CD4 gRNA oligos were annealed and cloned into the pSLQ1371 lentiviral expression vector using BstXI and BlnI (Gilbert et al., 2014). CD4 g+187 (NT) was the most efficient gRNA at CD4 knockdown. |
| <b>CD4 g+187 (NT)</b> | <b>TTGG</b> GAGTCTGACCACCTTACCTCT<br><b>GTTT</b> AAGAGC<br><b>TTAG</b> CTCTTAAACAGAGGTAAGGT<br>GGTCAGACTC <b>CAACAAG</b> |                                                                                                                                                                                                                                                                                                                     |
| CD4 g+189 (T)         | <b>TTGG</b> GCAAGAAAGACGCAAGCCCAG<br><b>GTTT</b> AAGAGC<br><b>TTAG</b> CTCTTAAACCTGGGCTTGCG<br>TCTTTCTTG <b>CAACAAG</b>  |                                                                                                                                                                                                                                                                                                                     |

### Genomic DNA Preparation from Cells

Genomic DNA was extracted from  $\sim 10^5$  cells with the DNeasy Blood & Tissue Kit (Qiagen). DNA samples were eluted in dH<sub>2</sub>O, and sample concentrations were normalized to 100 ng/ $\mu$ l.

### Genotyping Junction PCR

100 ng of genomic DNA were used in a 25  $\mu$ l of PCR reaction mix using Phusion High-Fidelity DNA Polymerase (NEB). Standard PCR conditions were used: 62°C annealing temperature and 30 seconds of extension at 72°C per 1 kb of product. Primers used for genotyping PCR amplification are listed below.

### Genotyping PCR Primers

| Primer    | Primer sequence (5' – 3') | Notes                                                                                                                                                                                                        |
|-----------|---------------------------|--------------------------------------------------------------------------------------------------------------------------------------------------------------------------------------------------------------|
| WT AAV F  | CGGTTAATGTGGCTCTGGTT      | Amplifies the WT AAVS1 junction spanning the TALEN cut site.<br>Expected PCR product size = 254 bp                                                                                                           |
| WT AAV R  | AGGATCCTCTCTGGCTCCAT      |                                                                                                                                                                                                              |
| AAV 5'J F | CTGCCGTCTCTCTCCTGAGT      | Amplifies the 5' integration junction of knock-in vectors into the AAVS1 locus<br><br>Depending on the antibiotic resistance of the knock-in vector either the Neo J R or the Puro J R primer should be used |
| Neo J R   | CTCGTCCTGCAGTTCATTCA      |                                                                                                                                                                                                              |
| Puro J R  | GTGGGCTTGACTCGGTCAT       |                                                                                                                                                                                                              |

### TOPO TA Cloning and Sequencing

Genomic DNA was extracted from CRISPRi and CRISPRn clones containing *OCT4* and *NANOG* gRNA before and after doxycycline treatment. The region spanning the first exon of *OCT4* and *NANOG* was amplified using amplification primers listed below using Phusion High-Fidelity DNA Polymerase (NEB). PCR products were cloned into TOPO-TA cloning vector (Life Technologies) and transformed into Turbo competent *E. coli* (NEB) according to manufacturer's instructions. For each condition, individual colonies (13–48) were picked and plasmid DNA was isolated using the QIAprep Spin Miniprep Kit (Qiagen) and sequenced using the T7 primer.

### ***OCT4* and *NANOG* Amplification Primers**

| <b>Primer</b>      | <b>Primer sequence (5' – 3')</b> | <b>Notes</b>                                                                                                                        |
|--------------------|----------------------------------|-------------------------------------------------------------------------------------------------------------------------------------|
| <i>OCT4</i> Seq F  | TCCACCCATCCAGGGGGCGG             | For genomic DNA amplification around the first exon of <i>OCT4</i> to identify mutations<br><br>Expected PCR product size = 580 bp  |
| <i>OCT4</i> Seq R  | CATGACCACCTCCCCACACC             |                                                                                                                                     |
| <i>NANOG</i> Seq F | CTTTTCCTTCTGGAGGTCCTAT           | For genomic DNA amplification around the first exon of <i>NANOG</i> to identify mutations<br><br>Expected PCR product size = 400 bp |
| <i>NANOG</i> Seq R | GGATTAGTTGATAATAACACTTCTTTA      |                                                                                                                                     |

### **Copy Number Assay using Droplet Digital PCR**

50 ng of genomic DNA from each sample was digested with 2.5 U of HaeIII (NEB) in 1x CutSmart buffer in a total volume of 20 µl. Samples were incubated at 37°C for 1 h and then heat inactivated at 65°C for 20 min. 5 µM of each forward and reverse primer and 18 µM Taqman MGB (FAM) probe for Neomycin or Puromycin-resistance genes (kindly provided by Jen Berman and Samantha Cooper at Bio-Rad) were mixed in dH<sub>2</sub>O. ddPCR reactions took place in a total volume of 25 µl containing 2 µl of digested DNA, 12.5 µl of 2x ddPCR Supermix for Probes (Bio-Rad), 1.25 µl of the premixed (FAM) primers/probe mixture, 1.25 µl of 20X (HEX) RPP30 reference primers/probe premix (Bio-Rad) and 10 µl dH<sub>2</sub>O. Droplet generation was performed according to the manufacturer's instructions on a QX100 Droplet Generator (Bio-Rad). The ddPCR thermocycling conditions were: step 1, 95°C 10 min; step 2, 94°C 30 s; step 3, 58°C (pre-optimized) 1 min; repeat steps 2 and 3 39 times; step 4, 98°C 10 min. The PCR amplified droplets were analyzed on the QX100 droplet reader (Bio-Rad) with the chosen setting "CNV2" (for 2 copies). The copy number was analyzed using Quantasoft software (Bio-Rad).

### **Primers and Probes for ddPCR Assay**

| <b>Primer / Probe</b> | <b>Primer / Probe sequence (5' – 3')</b> | <b>Notes</b>                                                    |
|-----------------------|------------------------------------------|-----------------------------------------------------------------|
| ddPCR-NeoF Primer     | CATGGCTGATGCAATGCG                       | Optimal annealing temp = 58°C<br>Expected Amplicon size = 68 bp |
| ddPCR-NeoR Primer     | TCGCTTGGTGGTCAATG                        |                                                                 |



|                    |                       |                                                                 |
|--------------------|-----------------------|-----------------------------------------------------------------|
| ddPCR-Neo Probe    | CGCTTGATCCGGCTACCTGCC |                                                                 |
| ddPCR-PuroF Primer | GTCACCGAGCTGCAAGAA    | Optimal annealing temp = 58°C<br>Expected Amplicon size = 57 bp |
| ddPCR-PuroR Primer | CACCTTGCCGATGTGCGAG   |                                                                 |
| ddPCR-Puro Probe   | CTCTTCCTCACGCGCGTCGG  |                                                                 |

### **Karyotyping**

Samples were sent to Cell Line Genetics for karyotypic analyses, where 20 metaphases were analyzed using G-band karyotyping.

### **Immunocytochemistry**

Cells were fixed in 4% (v/v) paraformaldehyde (Affymetrix) in PBS for 15 min and permeabilized in 0.1% (v/v) Triton X-100 (Sigma) for 15 min. Cells were blocked in 5% (w/v) bovine serum albumin (BSA) (Sigma) with 0.1% (v/v) Triton X-100 in PBS for 60 min. Cells were incubated overnight at 4°C with primary antibodies diluted in 5% (w/v) BSA and 0.1% (v/v) Triton X-100 in PBS. Then, cells were washed three times in PBS for 15 min each. Cells were then incubated for 1 h at room temperature with secondary antibodies diluted in 5% (w/v) BSA and 0.1% (v/v) Triton X-100 in PBS. Then, cells were washed three times in PBS for 15 min each. Finally, cell nuclei were counterstained using VECTASHIELD mounting medium with DAPI (Vector Laboratories). Images were taken under a Zeiss Axio Observer microscope and processed using ZEN 2012 software version 8.0. Table below contains a list of the primary and secondary antibodies and their appropriate dilution.

### **Flow Cytometry**

iPSCs and iPS-CMs were singularized with accutase. Cells were washed twice with PBS and fixed in 4% (v/v) paraformaldehyde (Affymetrix) in PBS for 10 min. Cells were then pelleted and washed with chilled (4°C) FACS buffer consisting of 0.5% BSA (w/v) and 2 mM EDTA in PBS. Next, the samples were incubated in primary antibody for 30 min, followed by three washes in PBS. Finally, the samples were incubated in the appropriate secondary antibody for 30 min, followed by washes in PBS. Table below lists the antibodies used for these experiments. All experiments that measure GCaMP or mCherry intensity were performed on live cells without fixation, immediately after harvesting in PBS. For each sample, 20,000 events were captured on the MACSQuant VYB flow cytometer and analysed with FlowJo X 10.0.7r2.

### **Western blots**

Cell pellets were collected, washed with PBS and resuspended in RIPA lysis buffer (150 mM NaCl, 1 mM EDTA, 0.5% sodium deoxycholate, 50 mM Tris-HCl, 0.1% SDS, 2% TritonX-100, pH 8.0) containing a protease inhibitor cocktail (Roche). Samples were incubated for 30 min on ice and sonicated for 10 sec. 20 µg of each lysate were loaded per lane of a NuPAGE 4–12% Bis-Tris

polyacrylamide gel (Life Technologies). The gel was transferred onto a Nitrocellulose iBlot gel transfer stack using the iBlot gel transfer device (Life Technologies). The membrane was blocked in Odyssey Blocking Buffer (PBS) (LI-COR) for 1 h. Membranes were probed with the appropriate primary and secondary antibodies listed in the Table below. All primary antibodies were incubated overnight at 4°C while secondary antibodies were left at room temperature for 1 h. Blots were imaged using the Odyssey Fc imaging system (LI-COR). Quantification of band intensities was performed using imageJ.

### Primary and Secondary Antibodies

| Type                    | Antibody                                                 | Application         | Dilution         | Species                       | Manufacturer and Catalog Number  |
|-------------------------|----------------------------------------------------------|---------------------|------------------|-------------------------------|----------------------------------|
| Primary                 | Anti-OCT4                                                | Immunocytochemistry | 1:200            | Mouse monoclonal              | Santa Cruz Biotechnology sc-5279 |
|                         |                                                          | Western blot        | 1:1000           |                               |                                  |
|                         |                                                          | Flow cytometry      | 1:50             |                               |                                  |
|                         | Anti-NANOG                                               | Immunocytochemistry | 1:200            | Mouse monoclonal              | Millipore MABD24                 |
|                         |                                                          | Western blot        | 1:1000           |                               |                                  |
|                         | Anti-SOX2                                                | Immunocytochemistry | 1:200            | Rabbit polyclonal             | Abcam ab59776                    |
|                         | Anti-BAG3                                                | Immunocytochemistry | 1:2000           | Rabbit polyclonal             | Abcam ab47124                    |
|                         | Anti-MYBPC3                                              | Immunocytochemistry | 1:200            | Rabbit polyclonal             | Abcam ab110832                   |
|                         |                                                          | Western blot        | 1:1000           |                               |                                  |
|                         | Anti-ACTN2                                               | Immunocytochemistry | 1:500            | Mouse monoclonal              | Sigma A7732                      |
|                         |                                                          | Western blot        | 1:1000           |                               |                                  |
|                         | Anti-TNNT2                                               | Flow cytometry      | 1:100            | Mouse monoclonal              | Thermo scientific MS-295-P1      |
|                         | Anti-GAPDH                                               | Western blot        | 1:1000           | Rabbit polyclonal             | Abcam ab9485                     |
|                         | Anti-FLAG                                                | Flow cytometry      | 1:100            | Mouse monoclonal              | Sigma F3165                      |
| Anti-Cas9               | Immunocytochemistry                                      | 1:200               | Mouse monoclonal | Diagenode C15200203           |                                  |
|                         | Western blot                                             | 1:1000              |                  |                               |                                  |
|                         | Flow cytometry                                           | 1:100               |                  |                               |                                  |
| Anti-CD4 APC-Conjugated | Flow cytometry                                           | 1:100               | Mouse monoclonal | BD 555349                     |                                  |
| Secondary               | Goat anti-Mouse IgG (H+L), Alexa Fluor 647 conjugate     | Immunocytochemistry | 1:500            | Goat anti-mouse IgG (H+L)     | Life Technologies A-21236        |
|                         | Chicken anti-Rabbit IgG (H+L), Alexa Fluor 647 conjugate | Immunocytochemistry | 1:500            | Chicken anti-rabbit IgG (H+L) | Life Technologies A-21443        |

|  |                                                      |                     |        |                                |                           |
|--|------------------------------------------------------|---------------------|--------|--------------------------------|---------------------------|
|  | Goat anti-Mouse IgG (H+L), Alexa Fluor 488 conjugate | Immunocytochemistry | 1:500  | Goat anti-mouse IgG (H+L)      | Life Technologies A-11001 |
|  | IRDye® 800CW Donkey anti-Rabbit IgG (H + L)          | Western blot        | 1:2500 | Donkey anti-rabbit IgG (H + L) | Li-COR 926-32213          |
|  | IRDye® 680LT Donkey anti-Mouse IgG (H + L)           | Western blot        | 1:2500 | Donkey anti-mouse IgG (H + L)  | Li-COR 926-68022          |

### **CRISPRi and CRISPRn Knockdown and Knockout Assays in iPSCs**

Initial rounds of knockdown or knockout screening with different gRNAs per gene were performed in polyclonal populations (greater than ~90% positive for mKate2). Unless specified, in all knockdown and knockout assays, iPSCs were cultured in mTeSR supplemented with doxycycline (2  $\mu$ M; Sigma) for 7 continuous days before analysis. All corresponding negative controls (minus doxycycline) were maintained in mTeSR for 7 days. After identifying the most efficient gRNAs by TaqMan qPCR, immunocytochemistry, or flow cytometry, polyclonal populations of cells carrying the most efficient gRNA were subcloned by serial dilution. Subsequent analysis and assays were performed on clonal populations to obtain clean knockdowns or knockouts.

### **CRISPRi Knockdown Assays in Cardiac Mesoderm and iPS-CM**

For CRISPRi knockdown in cardiac progenitor cells, stable iPSCs containing gRNA were differentiated towards the cardiac lineage with the WNT-differentiation protocol (described below). Half of the samples were treated with doxycycline (2  $\mu$ M) from day 0 of differentiation (Figure S5A). Samples were harvested on day 4 of differentiation and analyzed using Taqman qPCR. For CRISPRi knockdown in iPS-CM, stable polyclonal iPSCs containing gRNA were differentiated into iPS-CM. On day 5 of differentiation, cells were enzymatically dissociated and replated onto Matrigel-coated plates at a density of  $2.5 \times 10^4$  cells/cm<sup>2</sup>. Half of the cells were treated with media supplemented with doxycycline (2  $\mu$ M) and the other half was treated with media only. Doxycycline was maintained throughout the differentiation process (either day 15 for non-lactate-treated cells or day-35 for lactate-treated cells) until cells were harvested.

### **RNA Extraction and TaqMan qPCR Analysis**

RNA was extracted from approximately  $10^5$  cells with TRIzol reagent (Life Technologies) and cleaned up with the PureLink RNA Kit (Life Technologies) according to manufacturer's instructions. Samples were then treated with DNaseI (Life Technologies) for 30 min at 37°C. Then, 1  $\mu$ g of total RNA was reverse-transcribed into first-strand cDNA using SuperScript III (Life Technologies) with random hexamers, following the manufacturer's instructions. Real-Time qPCR reactions were performed in TaqMan Universal PCR Master Mix (Life Technologies) with the TaqMan probes listed in the table below. Quantification of gene expression was carried out with probes against the target gene and normalized against three ubiquitously expressed endogenous controls 18S,

*GAPDH*, and *UBC* for iPSCs and cardiac mesoderm cells. For iPSC-CM, qPCR results were validated with three independent biological replicates to minimize batch-to-batch variability in the timing of cardiac-specific marker expression. In addition to three housekeeping genes (*18S*, *GAPDH*, and *UBC*), two cardiac-specific markers (*TNNT2* and *MYH6*) were used to normalize expression of target genes. Relative expression of the gene of interest was normalized against endogenous or cardiac-specific genes using the difference in threshold-cycle ( $C_T$ ) values between the gene of interest and endogenous control by the  $2^{-\Delta\Delta C_T}$  method (Schmittgen and Livak, 2008).

### TaqMan qPCR Probes

| Gene Probe                    | Gene ID       | Exon Boundary | Amplicon Length (bp) | Marker                     |
|-------------------------------|---------------|---------------|----------------------|----------------------------|
| <i>OCT4</i>                   | Hs00742896_s1 | 1–1           | 65                   | Pluripotency               |
| <i>NANOG</i>                  | Hs02387400_g1 | 1–2           | 109                  | Pluripotency               |
| <i>SOX2</i>                   | Hs01053049_s1 | 1–1           | 91                   | Pluripotency               |
| <i>ROCK1</i>                  | Hs01127699_m1 | 1–2           | 79                   | Kinase                     |
| <i>GSK3<math>\beta</math></i> | Hs01047719_m1 | 1–2           | 65                   | Kinase                     |
| <i>BAG3</i>                   | Hs00188713_m1 | 1–2           | 83                   | Co-chaperone protein       |
| <i>HERG</i>                   | Hs00542479_g1 | 6–7           | 67                   | K <sup>+</sup> ion channel |
| <i>PAX6</i>                   | Hs01088112_m1 | 4–5           | 55                   | Neuronal marker            |
| <i>T</i>                      | Hs00610080_m1 | 8–9           | 132                  | Mesoderm marker            |
| <i>MESP1</i>                  | Hs00251489_m1 | 1–2           | 80                   | Cardiac mesoderm marker    |
| <i>MYBPC3</i>                 | Hs00165232_m1 | 12–13         | 56                   | Cardiac sarcomeric protein |
| <i>TNNT2</i>                  | Hs00165960_m1 | 10–11         | 89                   | Cardiac sarcomeric protein |
| <i>MYH6</i>                   | Hs01101425_m1 | 20–21         | 67                   | Cardiac sarcomeric protein |
| <i>UBC</i>                    | Hs00824723_m1 | 1–2           | 71                   | Housekeeping               |
| <i>18S</i>                    | Hs99999901_s1 | 1–1           | 187                  | Housekeeping               |
| <i>GAPDH</i>                  | Hs02758991_g1 | 6–7           | 93                   | Housekeeping               |

### iPSC-CM Differentiation

iPSCs were differentiated into iPSC-CM using the WNT modulation-differentiation method (Lian et al., 2012) (Figure S5A). Briefly, iPSCs were seeded at  $1.25\text{--}2.5 \times 10^4$  cells/cm<sup>2</sup> onto cell-culture plates coated with 80  $\mu\text{g}/\mu\text{l}$  growth factor-reduced Matrigel (BD Biosciences) in mTeSR supplemented with 10  $\mu\text{M}$  Y-27632 (Selleckchem) for 24 h (day –3). mTeSR medium was changed daily for the next 2 days. On day 0, iPSCs were treated with 12  $\mu\text{M}$  CHIR99021 (CHIR) (Tocris) in RPMI/B27 without insulin (Life Technologies) for exactly 24 h. On day 1, the culture medium was replaced with fresh RPMI/B27 without insulin and maintained for 48 h. On day 3, cells were treated with 5  $\mu\text{M}$  IWP2 (Tocris) in RPMI/B27 without insulin and maintained for 48 h. On day 5, fresh RPMI/B27 without insulin was added to the cells, and on day 7, the medium was switched to RPMI/B27 with insulin. Afterward, fresh RPMI/B27 with insulin was added to the

cells every 3 days. Functional iPS-CM appeared in culture between days 8 and 10 post-CHIR treatment.

### **Lactate Purification of iPS-CM**

iPS-CM were purified via a modified version of the lactate metabolic-selection method (Tohyama et al., 2013). Briefly, 1 M lactate-stock solution was prepared in 1 M HEPES buffer (Sigma) with sodium L-lactate powder (Sigma). Glucose-free DMEM (Life Technologies) supplemented with 4 mM lactate solution, 1X Glutamax, and 1X non-essential amino acids (Life Technologies) was prepared as the selection medium. On day 15 post-CHIR treatment, iPS-CMs were split 1:2 onto Matrigel-coated 10-cm dishes in RPMI/B27 (Life Technologies) supplemented with insulin and Y-27632 (10  $\mu$ M). Replated cells were allowed to recover for 5 days in RPMI/B27 supplemented with insulin before selection. Cells were then washed with PBS and incubated in lactate-selection medium, changed every other day for 4 days. Then, the medium was replaced with RPMI/B27 supplemented with insulin. Cells were allowed to recover for 3 days before being harvested.

### **Calcium-Transient Analysis of iPS-CMs**

Lactate-purified iPS-CMs were replated onto Matrigel-coated plates and allowed to recover for 10 days before phenotypic analysis and immunostaining. Calcium transients in iPS-CMs were measured using the GCaMP signal to indicate intensity changes in GFP-flourescence. Videos were recorded with a Zeiss Axio Observer microscope, processed with ZEN 2012 software version 8.0, and analyzed with ImageJ.

### **Electrophysiology**

Contracting iPS-CM were dissociated with trypsin (0.25%) and replated onto Matrigel-coated coverslips. After reconfirming visible beating, coverslips were placed in a superfusion bath (Warner, RC26-GLP) on a Nikon TiS inverted microscope equipped with a microfluorometer (IonOptix LLC). Superfusion solutions were warmed to 30°C with a superfusion system and heated perfusion pencil (ValveLink, AutoMate Scientific). Small clusters (five or fewer cells) of spontaneously contracting iPS-CMs were selected for study, with one cell under amphotericin B-perforated patch clamp (Spencer et al., 2014). Briefly, patch electrodes of approximately 2–4 M $\Omega$  (WPI) were tip-filled by dipping (20 s) them in an intracellular solution containing: KCl (120 mM), NaHEPES (20 mM), MgATP (10 mN), K<sub>2</sub>EGTA (5 mM), MgCl<sub>2</sub> (2 mM), and adjusted to pH 7.1 with KOH. This solution was then back filled with the same solution, including amphotericin B (240  $\mu$ g/ml). Coverslips were superfused at a constant flow (Warner, DN series) with modified Tyrode's extracellular solution containing: NaCl (137 mM), NaHEPES (10 mM), dextrose (10 mM), KCl (5 mM), CaCl<sub>2</sub> (2 mM), and MgCl<sub>2</sub> (1 mM), set to pH 7.4 with NaOH. Spontaneous action potentials (APs) were recorded in current clamp mode with zero applied current, and Ca<sup>2+</sup> signals were low-pass filtered at 2 kHz and digitized at 5 kHz for 30 s per data file.

## Supplemental References

- Gilbert, L.A., Horlbeck, M.A., Adamson, B., Villalta, J.E., Chen, Y., Whitehead, E.H., Guimaraes, C., Panning, B., Ploegh, H.L., Bassik, M.C., et al. (2014). Genome-Scale CRISPR-Mediated Control of Gene Repression and Activation. *Cell* 159, 647–661.
- Lian, X., Hsiao, C., Wilson, G., Zhu, K., Hazeltine, L.B., Azarin, S.M., Raval, K.K., Zhang, J., Kamp, T.J., and Palecek, S.P. (2012). Robust cardiomyocyte differentiation from human pluripotent stem cells via temporal modulation of canonical Wnt signaling. *Proc. Natl. Acad. Sci.* 201200250.
- Okita, K., Matsumura, Y., Sato, Y., Okada, A., Morizane, A., Okamoto, S., Hong, H., Nakagawa, M., Tanabe, K., Tezuka, K., et al. (2011). A more efficient method to generate integration-free human iPS cells. *Nat. Methods* 8, 409–412.
- Schmittgen, T.D., and Livak, K.J. (2008). Analyzing real-time PCR data by the comparative CT method. *Nat. Protoc.* 3, 1101–1108.
- Spencer, C.I., Baba, S., Nakamura, K., Hua, E.A., Sears, M.A.F., Fu, C., Zhang, J., Balijepalli, S., Tomoda, K., Hayashi, Y., et al. (2014). Calcium Transients Closely Reflect Prolonged Action Potentials in iPSC Models of Inherited Cardiac Arrhythmia. *Stem Cell Rep.* 3, 269–281.
- Tohyama, S., Hattori, F., Sano, M., Hishiki, T., Nagahata, Y., Matsuura, T., Hashimoto, H., Suzuki, T., Yamashita, H., Satoh, Y., et al. (2013). Distinct Metabolic Flow Enables Large-Scale Purification of Mouse and Human Pluripotent Stem Cell-Derived Cardiomyocytes. *Cell Stem Cell* 12, 127–137.
